# Supplementary material
Source: PubMed Central journal article supplement (PMC1851056)

**A**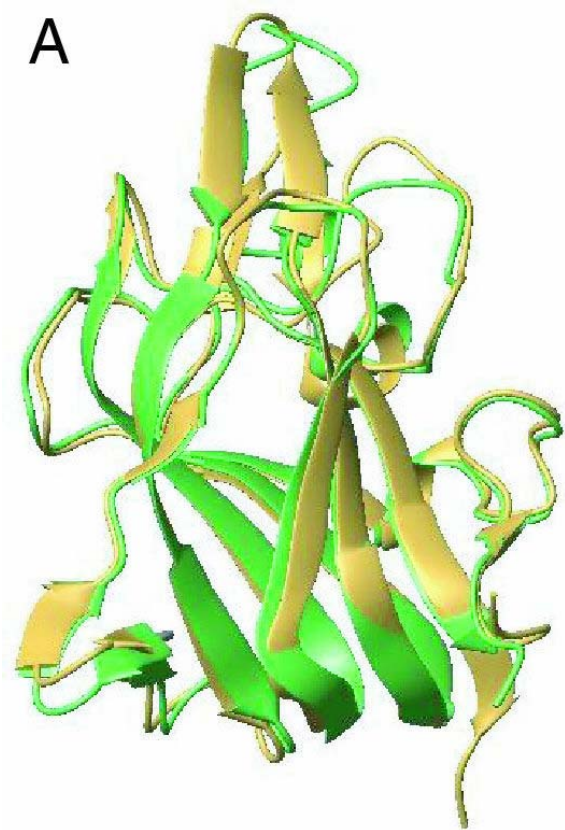**B**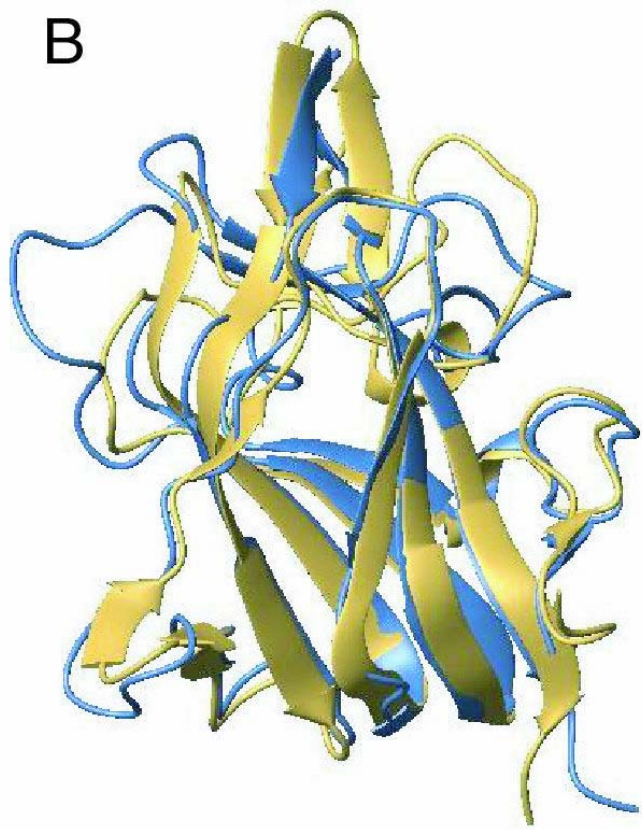

Supplement: pnas_0700043104_1.pdf [file pnas_0700043104_1.pdf]

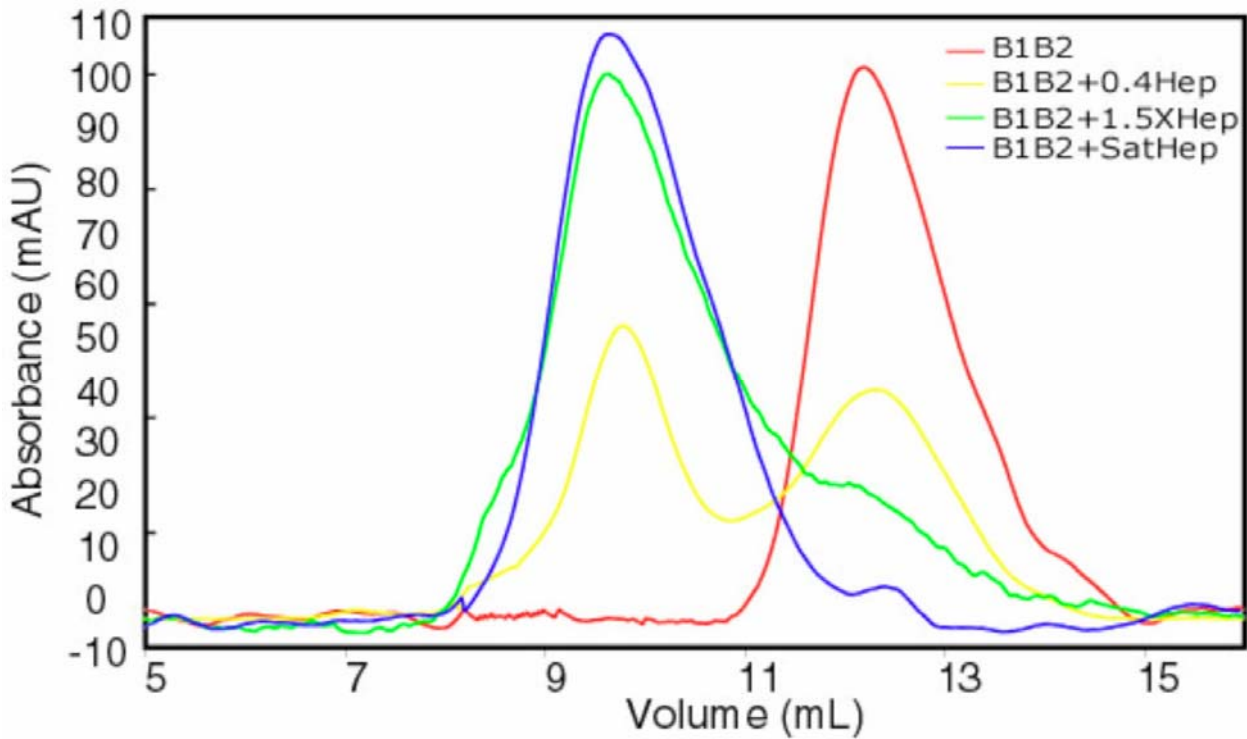

Supplement: pnas_0700043104_2.pdf [file pnas_0700043104_2.pdf]

b1b2 V165 V121 V165 V121 165:121  
Load Load Load Elute Elute 1:1 Mix

N1b1b2

V165

V121

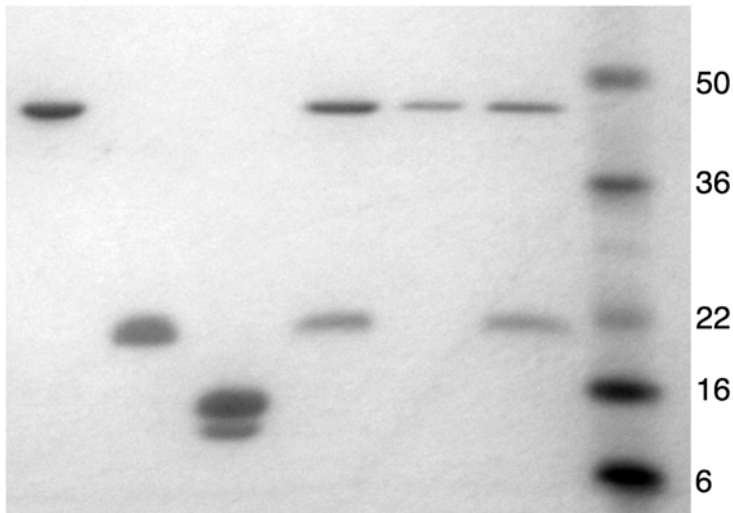

Supplement: pnas_0700043104_3.pdf [file pnas_0700043104_3.pdf]
